# Supplementary material
Source: HighWire-hosted journal article supplement (https://www.haematologica.org/content/suppl/2014/10/01/haematol.2014.104992)
Supplement: 2014_104992-Contributions.pdf [file 2014_104992-Contributions.pdf]

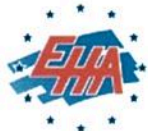

EUROPEAN  
HEMATOLOGY  
ASSOCIATION

 **haematologica**

Journal of the European Hematology Association  
Owned & published by the Ferrata Storti Foundation

## AUTHOR CONTRIBUTION FORM

|                     |                                                                                                                                                           |
|---------------------|-----------------------------------------------------------------------------------------------------------------------------------------------------------|
| <b>Title</b>        | <i>The activating STAT5B N642H mutation is a common abnormality in pediatric T-cell acute lymphoblastic leukemia and confers a higher risk of relapse</i> |
| <b>First author</b> | <i>Obul R. Bandapalli*, Stephanie Schuessele*, Joachim B. Kunz*, Tobias Rausch*</i>                                                                       |

According to the International Committee of Medical Journal Editors (ICMJE)

([http://www.icmje.org/ethical\\_1author.html](http://www.icmje.org/ethical_1author.html)):

*“Authorship credit should be based on: 1) substantial contributions to conception and design, acquisition of data, or analysis and interpretation of data; 2) drafting the article or revising it critically for important intellectual content; and 3) final approval of the version to be published. Authors should meet conditions 1, 2 and 3. Acquisition of funding, collection of data, or general supervision of the research group alone does not constitute authorship”.*

**The responsible author of this manuscript confirms that all persons designated as authors qualify for authorship, and that each author has participated sufficiently in the work to take public responsibility for appropriate portions of the content.**

**Responsible author** (*author responsible for the integrity of the work as a whole*)

**Name:** Andreas E Kulozik

**Institute:** Children's Hospital, University of Heidelberg, Heidelberg, Germany

**e-mail:** [Andreas.kulozik@med.uni-heidelberg.de](mailto:Andreas.kulozik@med.uni-heidelberg.de)

### Author contributions

*Please describe the contributions of each author, indicating who was responsible for each part of the study and the preparation of the manuscript (collection of data, experiments, data analysis, generation of figures, interpretation of data, preparation of the text, etc.) :*

O.R.B., S.S., J.E. and A.M.S. performed the experiments. J.B.K. and O.R.B designed research and experiments and wrote the manuscript jointly with A.E.K.. O.R.B., S.S. and J.B.K. analyzed and interpreted results. T.R. performed the computational analysis of the WES data jointly with J.B.K.. S.I., N.T., I.G. and N.G. contributed to experiments with BaF3 cells. R.K.S., J.H., A.S., M.S., M.S., R.K., S.A., R.H. contributed patient samples and clinical data. M.Z. and J.H. performed statistical analysis. V.F., J.P.B. and B.B. performed xenograft experiments. A.M.S. prepared sample libraries for capture-based enrichment and WES, and performed quality control analyses of the WES data jointly with T.R.. J.O.K., M.U. M. and A.E.K. designed and oversaw the research. All authors read and approved the manuscript.

*Andreas E Kulozik*  
11.6.14
